# Supplementary material for: Polymer-Degrading Enzymes of Pseudomonas chloroaphis PA23 Display Broad Substrate Preferences
Source: MDPI journal article supplement (doi:10.3390/ijms24054501), 2023-02-24
Supplement: s1 [file s1]

***Supplementary Material***  
**Polymer-Degrading Enzymes of *Pseudomonas chloroaphis***  
**PA23 Display Broad Substrate Preferences**

**Nisha Mohanan <sup>1</sup>, Michael C.-H. Wong <sup>2</sup>, Nediljko Budisa <sup>2,3</sup> and David B. Levin <sup>1,\*</sup>**

<sup>1</sup> Department of Biosystems Engineering, University of Manitoba, Winnipeg, MB R3T 5V6, Canada

<sup>2</sup> Department of Chemistry, University of Manitoba, 144 Dysart Rd., Winnipeg, MB R3T 2N2, Canada

<sup>3</sup> Biocatalysis Group, Technical University of Berlin, Müller-Breslau-Str. 10, D-10623 Berlin, Germany

\* Correspondence

Prof. David B. Levin, [david.levin@umanitoba.ca](mailto:david.levin@umanitoba.ca)

## **Table of contents**

Supplementary Figures S1-S3, pages 2 to 4

Supplementary Table S1, pages 5 and 6

**A**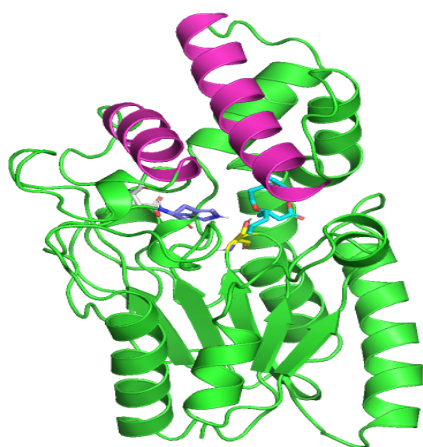**B**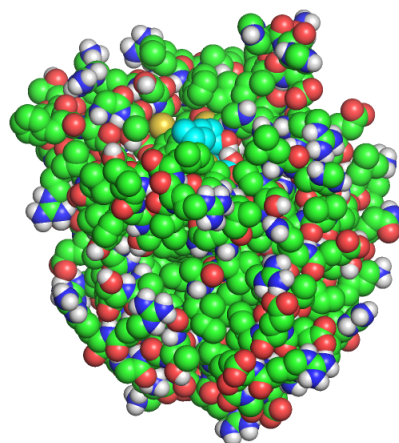**C**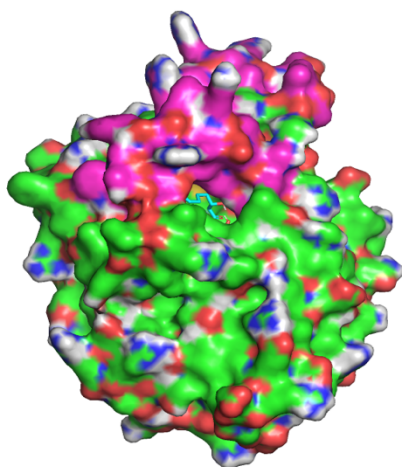**D**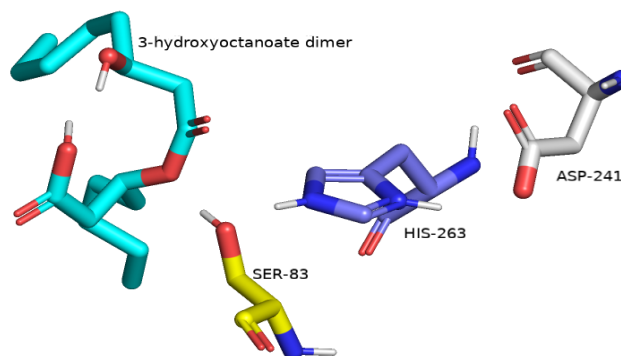

**Supplementary Figure S1. Model of the three-dimensional structure of LIP3 using *Proteus mirabilis* lipase as a template.** A) General diagram (Ribbon plot) of the LIP3 scaffold with labeled residues of the catalytic triad Ser<sup>83</sup> (yellow) His<sup>263</sup> (slate) Asp<sup>241</sup> (gray) and docked substrate 3-hydroxyoctanoate dimer (cyan), the core domain (green) and the lid domain (magenta). B) Atomic model of LIP3 with docked substrate in van der Waals representation. C) Lipase LIP3 surface representation with the docked substrate (stick representation). D) The residues (stick model) of the catalytic triad around the substrate, colored as in A.

A

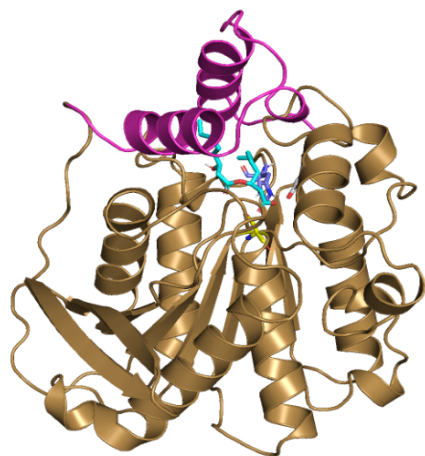

B

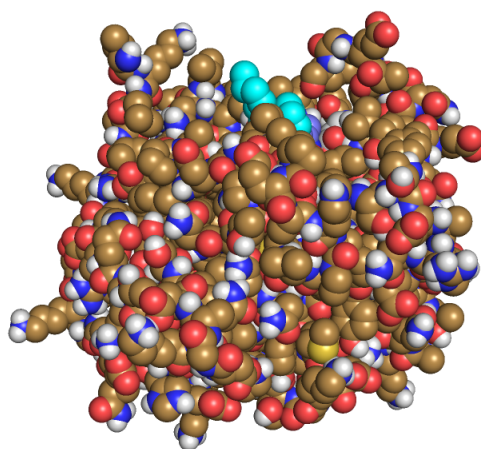

C

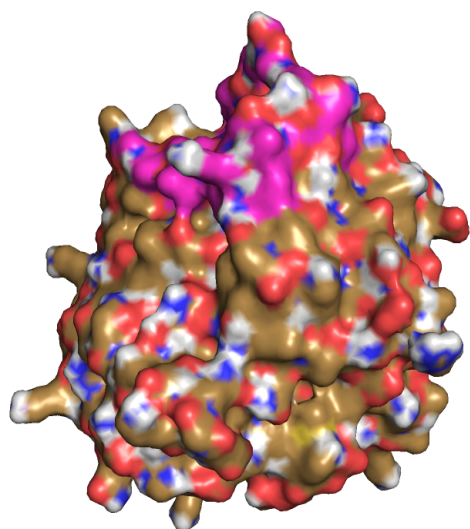

D

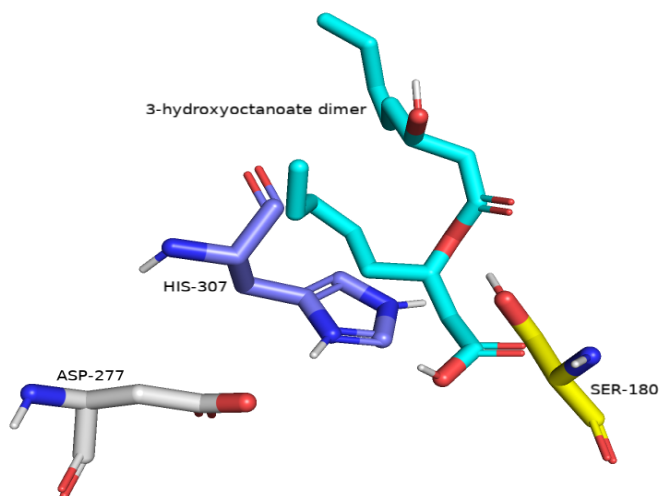

**Supplementary Figure S2. Model of the three-dimensional structure of Lip4 using the acetyl esterase CinB from *Enterobacter asburiae* as a template.** A) General diagram (Ribbon plot) of the LIP4 scaffold with labeled residues of the catalytic triad Ser<sup>180</sup> (yellow) His<sup>307</sup> (slate) Asp<sup>277</sup> (gray) and docked substrate substrate 3-hydroxyoctanoate dimer (cyan), the core domain (sand) and the lid domain (magenta). B) Atomic model of LIP4 with docked substrate in van der Waals representation. C) Lipase LIP4 surface representation with the docked substrate (stick representation). D) The residues (stick model) of the catalytic triad around the substrate, colored as in A.

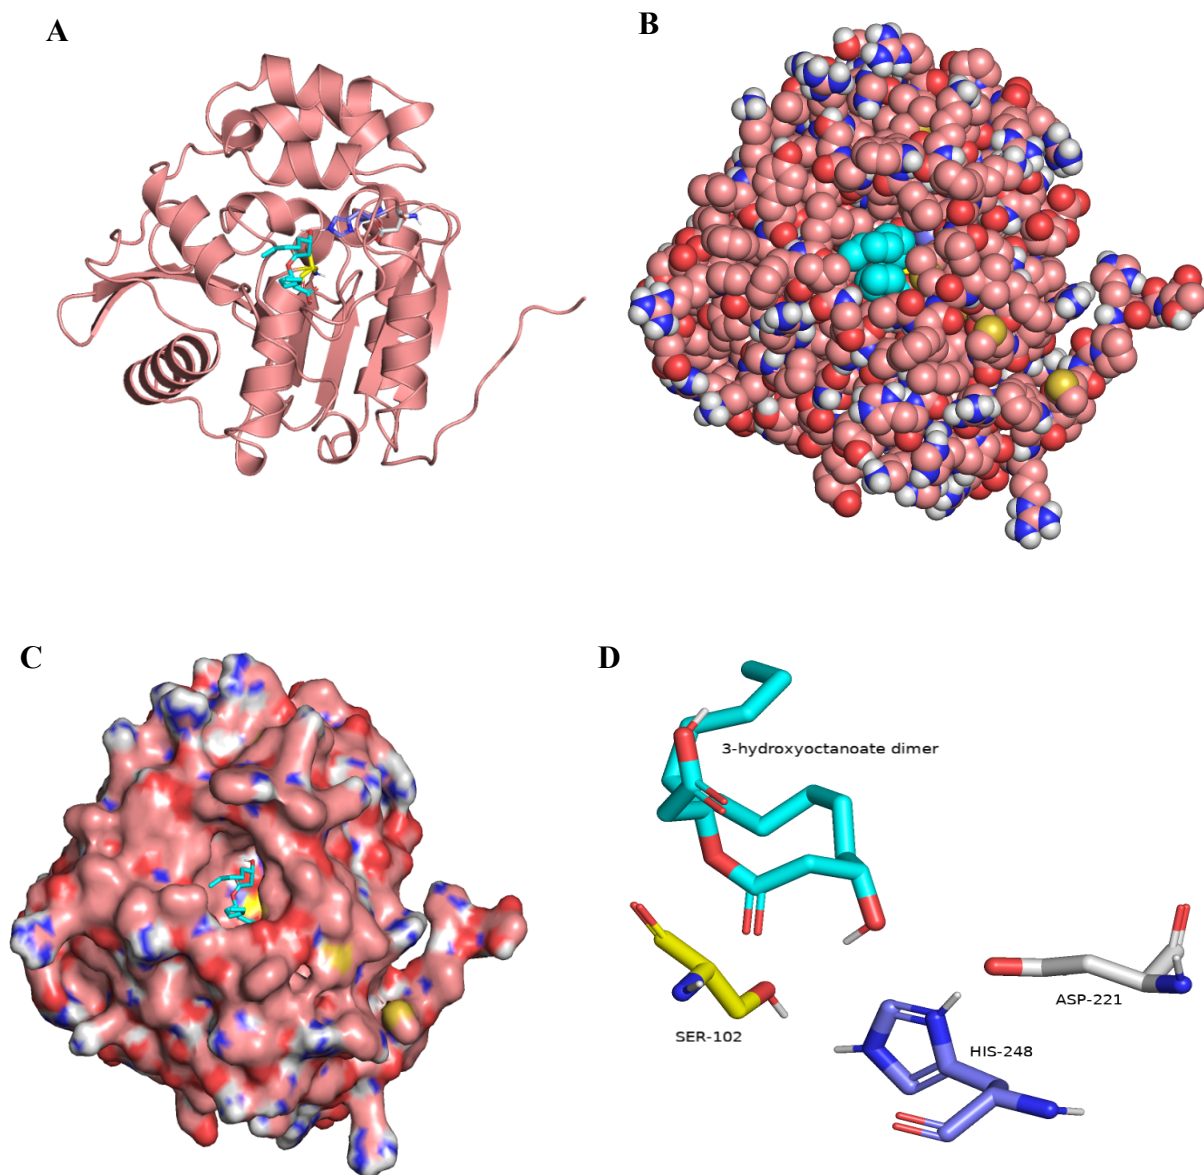

**Supplementary Figure S3. Model of the three-dimensional structure of PhaZ using the poly(3-hydroxyalkanoate) depolymerase from *Pseudomonas oleovorans* as a template.** A) General diagram (Ribbon plot) of the PhaZ scaffold with labeled residues of the catalytic triad Ser<sup>102</sup> (yellow) His<sup>248</sup> (slate) Asp<sup>221</sup> (gray) and docked substrate 3-hydroxyoctanoate dimer (cyan), the core domain (salmon) and the lid domain (magenta). B) Atomic model of PhaZ with docked substrate in van der Waals representation. C) PhaZ surface representation with the docked substrate (stick representation). D) The residues (stick model) of the catalytic triad around the substrate, colored as in A.

**Supplementary Table S1.** Quantitative results of GPC analysis showing the changes in polymer properties after treatment with LIP3, LIP4 and PhaZ compared with untreated polymers (control).

| Polymer | Test                     | Peaks  | Retention time (Minutes) | Mn (Da) | Mw (Da) | MP (Da) | Mz (Da) | Polydispersity (Mw/ Mn) | % Area | Height |
|---------|--------------------------|--------|--------------------------|---------|---------|---------|---------|-------------------------|--------|--------|
| PHBV    | Control                  | Peak 1 | 7.564                    | 23416   | 42700   | 34542   | 70858   | 1.82                    | 100    | 19040  |
|         | After reaction with LIP3 | Peak 1 | 7.669                    | 18034   | 34326   | 28043   | 56163   | 1.90                    | 88.13  | 18638  |
|         |                          | Peak 2 | 9.490                    |         |         | 857     |         |                         | 11.87  | 5246   |
|         | After reaction with LIP4 | Peak 1 | 7.676                    | 17229   | 32944   | 27687   | 53968   | 1.91                    | 94.60  | 19172  |
|         |                          | Peak 2 | 9.448                    |         |         | 927     |         |                         | 10.14  | 2023   |
|         | After reaction with PhaZ | Peak 1 | 7.644                    | 19626   | 37365   | 29479   | 65549   | 1.90                    | 91.99  | 18034  |
|         |                          | Peak 2 | 9.486                    |         |         | 863     |         |                         | 8.01   | 2928   |
| PHHx    | Control                  | Peak 1 | 7.685                    | 21305   | 42212   | 27177   | 80663   | 1.98                    | 100    | 18267  |
|         | After reaction with LIP3 | Peak 1 | 7.814                    | 14792   | 28142   | 20820   | 48782   | 1.90                    | 86.73  | 17337  |
|         |                          | Peak 2 | 9.476                    |         |         | 918     |         |                         | 13.27  | 7381   |
|         | After reaction with LIP4 | Peak 1 | 7.809                    | 14440   | 28934   | 21234   | 51658   | 2.00                    | 92.08  | 19875  |
|         |                          | Peak 2 | 9.432                    |         |         | 957     |         |                         | 7.92   | 3577   |
|         | After reaction with PhaZ | Peak 1 | 7.726                    | 16028   | 33601   | 23052   | 63801   | 1.78                    | 71.73  | 6050   |
|         |                          | Peak 2 | 9.476                    |         |         | 880     |         |                         | 28.27  | 5805   |
| PHO     | Control                  | Peak 1 | 7.803                    | 18931   | 36805   | 21477   | 69468   | 1.94                    | 100    | 22399  |
|         | After reaction with LIP3 | Peak 1 | 7.961                    | 13714   | 26373   | 17157   | 49023   | 1.92                    | 88.59  | 17276  |
|         |                          | Peak 2 | 9.461                    |         |         | 905     |         |                         | 11.41  | 4252   |
|         | After reaction with LIP4 | Peak 1 | 7.889                    | 14291   | 27005   | 18106   | 48239   | 1.88                    | 93.74  | 22672  |
|         |                          | Peak 2 | 9.435                    |         |         | 952     |         |                         | 6.26   | 3107   |
|         | After reaction with PhaZ | Peak 1 | 7.793                    | 16385   | 33489   | 20146   | 65639   | 2.726                   | 75.48  | 6683   |
|         |                          | Peak 2 | 9.486                    |         |         | 862     |         |                         | 24.52  | 8702   |
|         |                          |        |                          |         |         |         |         |                         |        |        |

|            |                          |        |       |        |        |        |        |       |        |       |
|------------|--------------------------|--------|-------|--------|--------|--------|--------|-------|--------|-------|
| <b>PHN</b> | Control                  | Peak 1 | 7.296 | 40489  | 101608 | 58889  | 249310 | 2.51  | 100    | 27411 |
|            | After reaction with LIP3 | Peak 1 | 7.559 | 23615  | 42104  | 34907  | 67216  | 1.78  | 90.43  | 18559 |
|            |                          | Peak 2 | 9.468 |        |        | 893    |        |       | 9.57   | 4039  |
|            | After reaction with LIP4 | Peak 1 | 7.381 | 32890  | 57596  | 49711  | 90088  | 1.75  | 87.55  | 14330 |
|            |                          | Peak 2 | 9.409 |        |        | 1000   |        |       | 12.45  | 4476  |
|            | After reaction with PhaZ | Peak 1 | 7.374 | 32974  | 57424  | 50418  | 92513  | 1.61  | 100    | 7994  |
| <b>PHD</b> | Control                  | Peak 1 | 7.679 | 17584  | 34145  | 27490  | 57727  | 1.94  | 100.00 | 26827 |
|            | After reaction with LIP3 | Peak 1 | 7.830 | 11607  | 24335  | 20348  | 42737  | 2.09  | 93.20  | 20428 |
|            |                          | Peak 2 | 9.472 |        |        | 887    |        |       | 6.80   | 3857  |
|            | After reaction with LIP4 | Peak 1 | 7.801 | 11908  | 25500  | 21590  | 45457  | 2.14  | 93.06  | 25498 |
|            |                          | Peak 2 | 9.429 |        |        | 963    |        |       | 6.94   | 4147  |
|            | After reaction with PhaZ | Peak 1 | 7.700 | 10471  | 29858  | 24302  | 54757  | 1.748 | 100    | 9005  |
| <b>PLA</b> | Control                  | Peak 1 | 6.698 | 111284 | 209736 | 191677 | 329504 | 1.88  | 100    | 23760 |
|            | After reaction with LIP3 | Peak 1 | 6.827 | 88291  | 169186 | 148392 | 269869 | 1.92  | 100    | 28038 |
|            | After reaction with LIP4 | Peak 1 | 6.744 | 108458 | 195139 | 174894 | 304117 | 1.79  | 100    | 27006 |
|            | After reaction with PhaZ | Peak 1 | 6.780 | 96247  | 185429 | 163042 | 295997 | 1.93  | 100    | 30163 |
| <b>PCL</b> | Control                  | Peak 1 | 6.711 | 130101 | 210551 | 186692 | 306961 | 1.62  | 100    | 72723 |
|            | After reaction with LIP3 | Peak 1 | 6.877 | 59427  | 142106 | 134503 | 244037 | 2.39  | 100    | 24883 |
|            | After reaction with LIP4 | Peak 1 | 7.055 | 46562  | 108800 | 94663  | 190941 | 2.33  | 100    | 47550 |
|            | After reaction with PhaZ | Peak 1 | 6.875 | 84975  | 153365 | 135128 | 235411 | 1.80  | 100    | 69359 |
| <b>PES</b> | Control                  | Peak 1 | 8.719 | 2685   | 4453   | 3619   | 6684   | 1.66  | 100    | 50502 |
|            | After reaction with LIP3 | Peak 1 | 8.733 | 2180   | 4016   | 3381   | 5918   | 1.84  | 100    | 48311 |
|            | After reaction with LIP4 | Peak 1 | 8.728 | 2122   | 4015   | 3413   | 5980   | 1.89  | 100    | 49303 |
|            | After reaction with PhaZ | Peak 1 | 8.750 | 2206   | 3949   | 3283   | 5823   | 1.79  | 100    | 48468 |

Da, Daltons; Mn, polymer average mass number; Mw, polymer average weight number; MP, peak average molecular weight; Mz, higher average molecular weight
